# Supplementary material for: Combination Treatment of Arazyme and Soy Leaf Extract Attenuates Hyperglycemia and Hepatic Steatosis in High-Fat Diet-Fed C57BL/6J Mice
Source: MDPI journal article supplement (doi:10.3390/life11070645), 2021-07-01
Supplement: s1 [file s1]

## Supplementary file

# Combination Treatment of Arazyme and Soy Leaf Extract Attenuates Hyperglycemia and Hepatic Steatosis in High-fat Diet-fed C57BL/6J Mice

Hwa Lee <sup>1,‡</sup>, Seona Cho <sup>1</sup>, Anna Kang <sup>1</sup>, Dong-Ha Shin <sup>2</sup>, Ho-Yong Park <sup>1,\*</sup>, and Tae-Sook Jeong <sup>1,\*</sup>

<sup>1</sup> Industrial Bio-materials Research Center, Korea Research Institute of Bioscience and Biotechnology, Daejeon 34141, Korea; leehua@kribb.re.kr (H.L.); baby5624@naver.com (S.C.); ank4200@gmail.com (A.K.)

<sup>2</sup> Insect Biotech Co., Ltd., Daejeon 34054, Korea; dhshin@insectbiotech.co.kr

‡ Earlier known as Hua Li

\* Correspondence: tsjeong@kribb.re.kr (T.-S.J.); hypark@kribb.re.kr (H.-Y.P.); Tel.: +82-42-860-4558 (T.-S.J.); +82-42-860-4650 (H.-Y.P.)

Primer sequences used in this article are described in Table S1.

The inguinal mRNA expression of browning-related factors, including *Ucp1*, *Pgc1a*, and *Adrb3*, were not changed in all groups (Figure S1).

Arazyme and ESL combination treatment significantly reduced lipid accumulation-related gene expression including sterol regulatory element-binding transcription factor 1 (*Srebf1*), MLX-interacting protein-like (*Mlxipl*), acetyl-CoA carboxylase 1 (*Acc1*), *Acc2*, fatty acid synthase (*Fas*), stearoyl-CoA desaturase 1 (*Scd1*), and *Scd2*, compared with the single treatment groups (Figure S2).

Table S1. Sequences of primers used for real-time qRT-PCR

| Gene name                      | Forward primer                 | Reverse primer              |
|--------------------------------|--------------------------------|-----------------------------|
| <i>Acc1</i> (NM_13360)         | AGTTTCCCAGCCAGCAGATT           | ATCCATCACCACAGCCTTCA        |
| <i>Acc2</i> (NM_133904)        | CCCATCACCCTCTTCTGA             | GTCCGAGTCTCCACAGCAAT        |
| <i>Acox</i> (NM_015729)        | GCTGGGCTGAAGGCTTTTACTA         | AATCCCACTGCTGTGAGAATAGC     |
| <i>Adiponectin</i> (NM_009605) | CATGCCGAAGATGACGTTAC           | CGATACACATAAGCGGCTTC        |
| <i>Adrb3</i> (NM_013462)       | AGGCAACCTGCTGGTAATCA           | TCCACAGTTCGCAACCAGTT        |
| <i>Apob</i> (NM_009693)        | CCCGTGATACCTACCAGAAT           | CTGCCATGTGGTACTTCTGA        |
| <i>Cd36</i> (NM_007643)        | TGCTGGAGCTGTTATGGTG            | CTCAAAGATGGCTCCATTGG        |
| <i>Cpt1a</i> (NM_013495)       | CTGCACTCCTGGAAGAAGAA           | GTTCTTCGCTGGCTTGACA         |
| <i>Cyp7a1</i> (NM_007824)      | GACATGGAGAAGGCTAAGAC           | TGAAGTCCTCCTTAGCTGTC        |
| <i>Cyp7b1</i> (NM_007825)      | TAGGAGCACATCATCTTGGC           | TCGGATGATGCTGGAGTATG        |
| <i>Cyp8b1</i> (NM_010012)      | TCTGGGTCCTCTATTTCCTG           | GGTTGAGGAACCGATCATAC        |
| <i>Fas</i> (NM_007988)         | TGTGAGTGGTTCAGAGGCAT           | TTCTGTAGTGCCAGCAAGCT        |
| <i>Gapdh</i> (NM_001001303)    | ACATCATCCCTGCATCCACT           | AGATCCACGACGGACACATT        |
| <i>Glut2</i> (NM_031197)       | TTTGTTCATCGCCCTCTGCTT          | GCAGCGATTTCCTCAAAAGACT      |
| <i>Hmgcr</i> (NM_008255)       | TAGGCTTGTCCTTGTTTAC            | GCTTTCTTTGAGGTCACGAC        |
| <i>Il1b</i> (NM_008361)        | ATGGCAACTGTTCTGAACTCAACT       | ATATTCTGTCCATTGAGGTGGAGAGCT |
| <i>Ins1</i> (NM_008386)        | ACCCACCCAGGCTTTTGTG            | CGGGACTTGGGTGTGTAGAAG       |
| <i>Ins2</i> (NM_001185083)     | CCCCACCCAGGCTTTTGT             | GCGGGACATGGGTGTGTAG         |
| <i>Insr</i> (NM_010568)        | CTGAACAAAGATGACAACGAGGAA       | CTTACAGATGGTTGGGCAAACTT     |
| <i>Irs1</i> (NM_010570)        | GAGAAGAGACTGGCTCGGAAGA         | GCCTATTCTGCCCAACTCAACT      |
| <i>Irs2</i> (NM_001081212)     | GGCCCGAACCTCAATAACAA           | CCGCGCAACACGAAAAAG          |
| <i>Mlxipl</i> (NM_021455)      | CAGATGCGGGACATGTTTGA           | AATAAAGGTCGGATGAGGATGCT     |
| <i>Mttp</i> (NM_001355051)     | CGTCCCCTGCTGTCATCTTA           | CCCCAATGGACAGCAGGAT         |
| <i>Nr1h4</i> (NM_009108)       | GACAGCGAAGGGCGTGACT            | TTTATTGTGATTTCCTGAGGCATT    |
| <i>Pcsk1</i> (NM_013628)       | CTGCTTTCGCCTTCTTTTGC           | CCGCCGCCATTTCATTA           |
| <i>Pcsk2</i> (NM_008792)       | GAAGACGCAGCCTACACCATAA         | CTCTCTTTTACGGTCAAATCCTTCT   |
| <i>Pgc1a</i> (NM_008904)       | GTGCAGCCAAGACTCTGTAT           | GGTCGCTACACCACTTCAAT        |
| <i>Ppara</i> (NM_011144)       | CCTGAACATCGAGTGTCGAA           | GTACTGGCATTGTTCCGGT         |
| <i>Pparg1</i> (NM_001127330)   | ATGTCTCACAATGCCATCAGGTT        | GCGGGAAGGACTTTATGTATGAGT    |
| <i>Pparg2</i> (NM_011146)      | TGTCTCACAATGCCATCAGGTT         | AGCGGGAAGGACTTTATGTATGAGT   |
| <i>Scd1</i> (NM_009127)        | ACGCCGACCCCTACAATTC            | AGTTTTCCGCCCTTCTCTTTG       |
| <i>Scd2</i> (NM_009128)        | CCGTGGCTTCTTTTCTCTCA           | TTCCGCCCTTCTCTTTGACA        |
| <i>Srebf1</i> (NM_011480)      | GAGCGAGCGTTGAACTGTAT           | ATGCTGGAGCTGACAGAGAA        |
| <i>Srebf2</i> (NM_033218)      | TCCTCCATCAACGACAAAATCA         | ACTTGTGCATCTTGGCATCTGT      |
| <i>Tnfa</i> (NM_001278601)     | CTCAGATCATCTTCTCAAAATTCGAGTGAC | CTTCACAGAGCAATGACTCCAAAGT   |
| <i>Ucp1</i> (NM_009463)        | CCAGGCTTCCAGTACCATTA           | GCCACACCTCCAGTCATTAA        |
| <i>Ucp2</i> (NM_011671)        | GCCTCTACGACTCTGTCAAA           | CTTCGACAGTGCTCTGGTAT        |

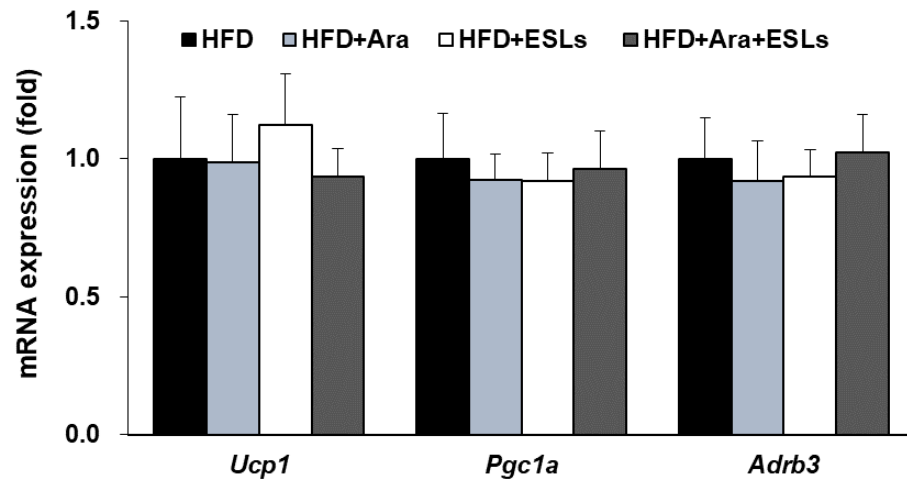

Figure S1. The browning-related gene expression in inguinal adipose tissue. Values are presented as means  $\pm$  SE (n = 6).

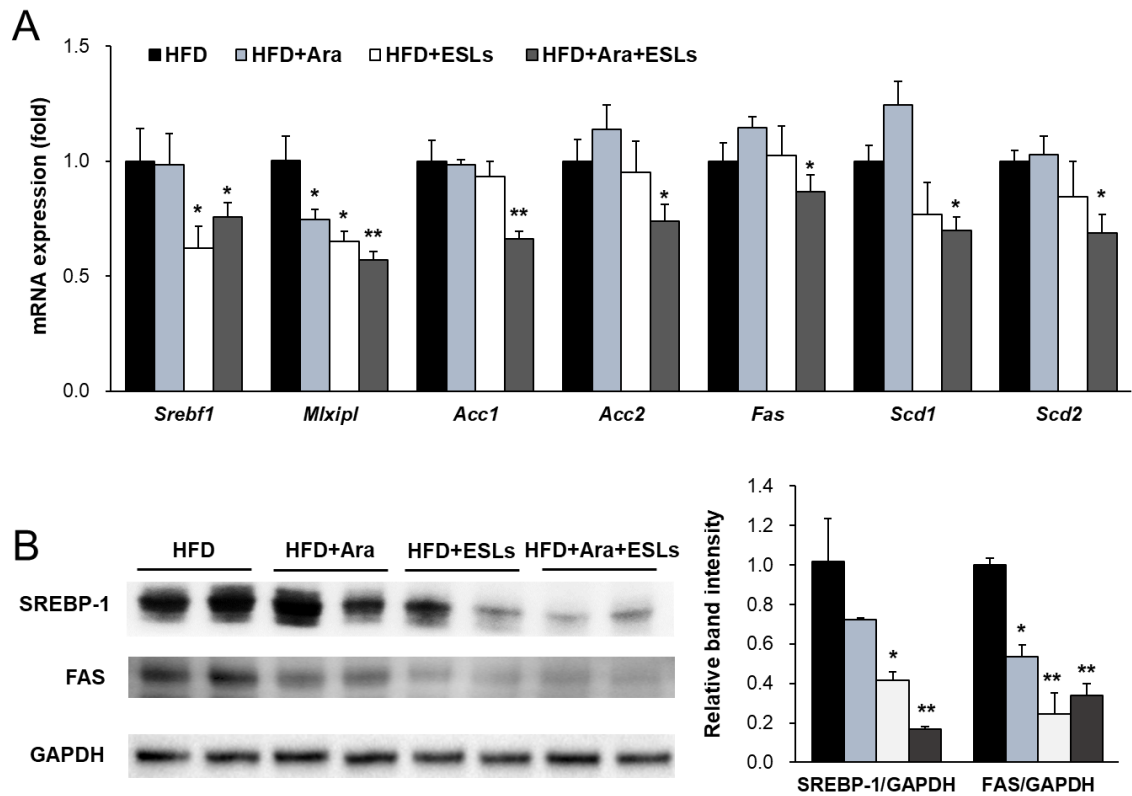

Figure S2. The combination treatment of Arazyme (Ara) and ESL suppressed hepatic lipogenesis-related gene and protein expression. (A) The hepatic mRNA expression levels were detected by real-time qRT-PCR and normalized using *Gapdh* as a reference gene. (B) The hepatic protein expression levels were detected by western blotting with anti-SREBP-1, anti-FAS, and anti-GAPDH antibodies. Values are presented as means  $\pm$  SE ( $n = 6$ ). \* $P < 0.05$ , \*\* $P < 0.01$  vs. HFD group.
